# Supplementary material
Source: PubMed Central journal article supplement (PMC4582963)
Supplement: imm0146-0217-sd1.pdf [file imm0146-0217-sd1.pdf]

| AmiGO2 Annotation of CD24 Co-Expressed Genes                |                                                                   |                                                                    |                                            |
|-------------------------------------------------------------|-------------------------------------------------------------------|--------------------------------------------------------------------|--------------------------------------------|
| Gene Symbol                                                 | Gene Name                                                         | Biological Process                                                 | Cell Component                             |
| APIAR                                                       | Adaptor-related protein complex 1 associated regulatory protein   | Negative Regulation Of Receptor Recycling                          | Nucleolus                                  |
|                                                             |                                                                   | Regulation Of Arp2/3 Complex-Mediated Actin Nucleation             | Cytoplasm                                  |
|                                                             |                                                                   | Cell Protein Localization                                          | Endosome                                   |
|                                                             |                                                                   | Vesicle Targeting, Trans-Golgi To Endosome                         | Golgi Apparatus                            |
|                                                             |                                                                   | Negative Regulation Of Substrate Adhesion-Dependent Cell Spreading | Transport Vesicle                          |
|                                                             |                                                                   | Negative Regulation Of Cell Motility                               |                                            |
| BAP1                                                        | BRCA1 associated protein-1 (ubiquitin carboxy-terminal hydrolase) | Regulation Of Cell Growth                                          | Intracellular                              |
|                                                             |                                                                   | Proteolysis                                                        | Nucleus                                    |
|                                                             |                                                                   | Ubiquitin-Dependent Protein Catabolic Processes                    | Cytoplasm                                  |
|                                                             |                                                                   | Negative Regulation Of Cell Proliferation                          | Polycomb Repressive Deubiquitinase Complex |
|                                                             |                                                                   | Chromatin Modification                                             |                                            |
|                                                             |                                                                   | Protein Deubiquitiation                                            |                                            |
|                                                             |                                                                   | Monoubiquitinated Protein Deubiquitiation                          |                                            |
|                                                             |                                                                   | Monoubiquitinated Histone H2A Deubiquitiation                      |                                            |
|                                                             |                                                                   | Regulation Of Cell Cycle                                           |                                            |
| Protein K48-Linked Deubiquitination                         |                                                                   |                                                                    |                                            |
| BCL2L1                                                      | BCL2-Like 1                                                       | Cytokinesis                                                        | Intracellular                              |
|                                                             |                                                                   | Ovarian Follicle Development                                       | Nucleus                                    |
|                                                             |                                                                   | In Utero Embryonic Development                                     | Cytoplasm                                  |
|                                                             |                                                                   | Release Of Cytochrome C From Mitochondria                          | Mitochondrion                              |
|                                                             |                                                                   | Response To Ischemia                                               | Mitochondrial Envelope                     |
|                                                             |                                                                   | Apoptotic Process                                                  | Mitochondrial Outer Membrane               |
|                                                             |                                                                   | Mitotic Cell Cycle Checkpoint                                      | Mitochondrial Inner Membrane               |
|                                                             |                                                                   | Germ Cell Development                                              | Centrosome                                 |
|                                                             |                                                                   | Spermatogenesis                                                    | Cytosol                                    |
|                                                             |                                                                   | Cell Proliferation                                                 | Cytoskeleton                               |
|                                                             |                                                                   | Positive Regulation Of Cell Proliferation                          | Membrane                                   |
|                                                             |                                                                   | Male Gonad Development                                             | Integral Component Of Membrane             |
|                                                             |                                                                   | Intrinsic Apoptotic Signalling Pathway In Response To Dna Damage   | Cell Junction                              |
|                                                             |                                                                   | Response To Radiation                                              | Cytoplasmic Vesicle                        |
|                                                             |                                                                   | Fertilization                                                      | Synapse                                    |
|                                                             |                                                                   | Response To Virus                                                  | Bcl-2 Family Protein Complex               |
|                                                             |                                                                   | Suppression By Virus Of Host Apoptotic Process                     |                                            |
|                                                             |                                                                   | Response To Cytoine                                                |                                            |
|                                                             |                                                                   | Growth                                                             |                                            |
|                                                             |                                                                   | Regulation Of Apoptotic Process                                    |                                            |
| Negative Regulation Of Apoptotic Process                    |                                                                   |                                                                    |                                            |
| Negative Regulation Of Cysteine-Type Endopeptidase Activity |                                                                   |                                                                    |                                            |
| Involved In Apoptotic Process                               |                                                                   |                                                                    |                                            |

| Gene Symbol | Gene Name                      | Biological Process                                                                      | Cell Component                                         |
|-------------|--------------------------------|-----------------------------------------------------------------------------------------|--------------------------------------------------------|
|             |                                | Negative Regulation Of Neuron Apoptotic Process                                         |                                                        |
|             |                                | Response To Cycloheximide                                                               |                                                        |
|             |                                | Regulation Of Mitochondrial Membrane Permeability                                       |                                                        |
|             |                                | Neuron Apoptotic Process                                                                |                                                        |
|             |                                | Regulation Of Mitochondrial Membrane Potential                                          |                                                        |
|             |                                | Cell Process Regulating Host Cell Cycle In Response To Virus                            |                                                        |
|             |                                | Mitochondrion Morphogenesis                                                             |                                                        |
|             |                                | Cellular Response To Amino Acid Stimulus                                                |                                                        |
|             |                                | Cellular Response To Alkaloid                                                           |                                                        |
|             |                                | Cellular Response To Gamma Radiation                                                    |                                                        |
|             |                                | Apoptotic Process In Bone Marrow                                                        |                                                        |
|             |                                | Negative Regulation Of Establishment Of Protein Localization To The Plasma Membrane     |                                                        |
|             |                                | Negative Regulation Of Release Of Cytochrome C From Mitochondria                        |                                                        |
|             |                                | Extrinsic Apoptotic Signalling Pathway In Absence Of Ligand                             |                                                        |
|             |                                | Hepatocyte Apoptotic Process                                                            |                                                        |
|             |                                | Negative Regulation Of Execution Phase Of Apoptosis                                     |                                                        |
|             |                                | Negative Regulation Of Intrinsic Apoptotic Signalling Pathway In Response To Dna Damage |                                                        |
|             |                                | Negative Regulation Of Anoikis                                                          |                                                        |
|             |                                | Negative Regulation Of Intrinsic Apoptotic Signalling Pathway                           |                                                        |
|             |                                | Negative Regulation Of Intrinsic Apoptotic Signalling Pathway                           |                                                        |
| BTBD10      | BTB (POZ) domain containing 10 | Positive Regulation Of Phosphorylation                                                  | Nucleus                                                |
|             |                                | Type B Pancreatic Cell Proliferation                                                    | Cytoplasm                                              |
|             |                                | Negative Regulation Of Neuron Death                                                     |                                                        |
| CAPSL       | Calcyphosine-like              | Biological Process                                                                      | Cellular Component                                     |
|             |                                |                                                                                         | Cytoplasm                                              |
| CD24        | CD24 molecule                  | Cell Activation                                                                         | Intracellular                                          |
|             |                                | Regulation Of Cytokine-Mediated Signaling Pathway                                       | Cell                                                   |
|             |                                | Response To Molecule Of Bacterial Origin                                                | Cytosol                                                |
|             |                                | Pre-B Cell Differentiation                                                              | Plasma Membrane                                        |
|             |                                | Leukocyte Migration Involved In Inflammatory Response                                   | External Side Of Plasma Membrane                       |
|             |                                | Positive Regulation Of T Cell Mediated Immune Response To Tumor Cell                    | Cell Surface                                           |
|             |                                | Positive Regulation Of Inflammatory Response To Antigenic Stimulus                      | Membrane                                               |
|             |                                | Positive Regulation Of B Cell Apoptotic Process                                         | Anchored Component Of Membrane                         |
|             |                                | Cell Adhesion                                                                           | Anchored Component Of External Side Of Plasma Membrane |
|             |                                | Heterophilic Cell-Cell Adhesion Via Plasma Membrane Cell Adhesion Molecules             | Microvillus Membrane                                   |
|             |                                | Leukocyte Cell-Cell Adhesion                                                            | Membrane Raft                                          |
|             |                                | Cell Surface Receptor Signaling Pathway                                                 | Ciliary Membrane                                       |
|             |                                | Positive Regulation Of Cytosolic Calcium Ion Concentration                              |                                                        |

| Gene Symbol | Gene Name                               | Biological Process                                                 | Cell Component               |
|-------------|-----------------------------------------|--------------------------------------------------------------------|------------------------------|
|             |                                         | Neuromuscular Synaptic Transmission                                |                              |
|             |                                         | Negative Regulation Of Neuroblast Proliferation                    |                              |
|             |                                         | Apoptotic Mitochondrial Changes                                    |                              |
|             |                                         | Positive Regulation Of Neuron Projection Development               |                              |
|             |                                         | Cell Migration                                                     |                              |
|             |                                         | Regulation Of Cell-Cell Adhesion                                   |                              |
|             |                                         | Positive Regulation Of Cell-Cell Adhesion                          |                              |
|             |                                         | Apoptotic Nuclear Changes                                          |                              |
|             |                                         | Negative Regulation Of B Cell Proliferation                        |                              |
|             |                                         | Neuron Projection Development                                      |                              |
|             |                                         | T Cell Costimulation                                               |                              |
|             |                                         | Chemokine Receptor Transport Out Of Membrane Raft                  |                              |
|             |                                         | Negative Regulation Of Transforming Growth Factor Beta3 Production |                              |
|             |                                         | Positive Regulation Of Integrin Activation                         |                              |
|             |                                         | Positive Regulation Of Cell Adhesion Mediated By Integrin          |                              |
|             |                                         | Regulation Of Cell-Cell Adhesion Mediated By Integrin              |                              |
|             |                                         | Positive Regulation Of Cell-Cell Adhesion Mediated By Integrin     |                              |
|             |                                         | Negative Regulation Of Erythrocyte Clearance                       |                              |
|             |                                         | Homotypic Cell-Cell Adhesion                                       |                              |
|             |                                         | Negative Regulation Of Erythrocyte Aggregation                     |                              |
|             |                                         | Positive Regulation Of T Cell Homeostatic Proliferation            |                              |
|             |                                         | Positive Regulation Of Activated T Cell Proliferation              |                              |
|             |                                         | Regulation Of Phosphorylation                                      |                              |
|             |                                         | Cholesterol Homeostasis                                            |                              |
|             |                                         | Positive Regulation Of Map Kinase Activity                         |                              |
|             |                                         | Regulation Of Mapk Cascade                                         |                              |
|             |                                         | Response To Estrogen                                               |                              |
|             |                                         | Regulation Of B Cell Differentiation                               |                              |
|             |                                         | Negative Regulation Of Neuron Differentiation                      |                              |
|             |                                         | Respiratory Burst                                                  |                              |
|             |                                         | Negative Regulation Of T Cell Homeostatic Proliferation            |                              |
|             |                                         | Positive Regulation Of Alpha-Beta T Cell Proliferation             |                              |
|             |                                         | Synaptic Vesicle Endocytosis                                       |                              |
|             |                                         | Positive Regulation Of Peptidyl-Tyrosine Phosphorylation           |                              |
|             |                                         | Negative Regulation Of Neurogenesis                                |                              |
|             |                                         | Positive Regulation Of Calcium-Mediated Signaling                  |                              |
|             |                                         | Positive Regulation Of Protein Tyrosine Kinase Activity            |                              |
|             |                                         | Apoptotic Signaling Pathway                                        |                              |
| COQ7        | Coenzyme Q7 homolog, ubiquinone (yeast) | Age-Dependent Response To Oxidative Stress                         | Nucleus                      |
|             |                                         | In Utero Embryonic Development                                     | Mitochondrion                |
|             |                                         | Neural Tube Formation                                              | Mitochondrial Inner Membrane |
|             |                                         | Ubiquinone Biosynthetic Process                                    | Membrane                     |
|             |                                         | Response To Oxidative Stress                                       |                              |

| Gene Symbol | Gene Name                                                | Biological Process                                     | Cell Component                     |
|-------------|----------------------------------------------------------|--------------------------------------------------------|------------------------------------|
|             |                                                          | Determination Of Adult Lifespan                        |                                    |
|             |                                                          | Neurogenesis                                           |                                    |
|             |                                                          | Respiratory Electron Transport Chain                   |                                    |
|             |                                                          | Cellular Response To Oxidative Stress                  |                                    |
|             |                                                          | Mitochondrial Atp Synthesis Coupled Electron Transport |                                    |
|             |                                                          | Oxidation-Reduction Process                            |                                    |
|             |                                                          | Mitochondrion Morphogenesis                            |                                    |
| CSRP2       | Cysteine and glycine-rich protein 2                      | Multicellular Organismal Development                   | Nucleus                            |
|             |                                                          | Cell Differentiation                                   | Focal Adhesion                     |
| DCK         | Deoxycytidine kinase                                     | Nucleobase-Containing Compound Metabolic Process       | Nucleus                            |
|             |                                                          | Pyrimidine Nucleotide Metabolic Process                | Cytosol                            |
|             |                                                          | Deoxyribonucleoside Monophosphate Biosynthetic Process |                                    |
|             |                                                          | Nucleotide Biosynthetic Process                        |                                    |
|             |                                                          | Phosphorylation                                        |                                    |
|             |                                                          | Drug Metabolic Process                                 |                                    |
|             |                                                          | Deoxycytidine Metabolic Process                        |                                    |
|             |                                                          | Respiratory Electron Transport Chain                   |                                    |
|             |                                                          | Cellular Response To Oxidative Stress                  |                                    |
|             |                                                          | Mitochondrial Atp Synthesis Coupled Electron Transport |                                    |
|             |                                                          | Oxidation-Reduction Process                            |                                    |
|             |                                                          | Mitochondrion Morphogenesis                            |                                    |
| DDC         | Dopa decarboxylase (aromatic L-amino acid decarboxylase) | Cellular Amino Acid Metabolic Process                  | Cytoplasm                          |
|             |                                                          | Response To Toxic Substance                            | Synaptic Vesicle                   |
|             |                                                          | Synaptic Vesicle Amine Transport                       | Axon                               |
|             |                                                          | Carboxylic Acid Metabolic Process                      | Neuronal Cell Body                 |
|             |                                                          | Dopamine Biosynthetic Process                          | Extracellular Vesicle Exosome      |
|             |                                                          | Catecholamine Biosynthetic Process                     |                                    |
|             |                                                          | Serotonin Biosynthetic Process                         |                                    |
| DNAJC21     | DnaJ (Hsp40) homolog, subfamily C, member 21             | Biological Process                                     | Cellular Component                 |
| EGFL6       | EGF-like-domain, multiple 6                              | Cell Adhesion                                          | Extracellular Region               |
|             |                                                          | Multicellular Organismal Development                   | Proteinaceous Extracellular Matrix |
|             |                                                          | Positive Regulation Of Cell-Substrate Adhesion         | Basement Membrane                  |
|             |                                                          | Cell Differentiation                                   | Membrane                           |
|             |                                                          | Extracellular Matrix Organization                      | Extracellular Matrix               |
| EHD2        | EH-domain containing                                     | Endocytosis                                            | Endosome                           |
|             |                                                          | Cortical Actin Cytoskeleton Organization               | Plasma Membrane                    |
|             |                                                          | Endocytic Recycling                                    | Caveola                            |

| Gene Symbol | Gene Name                                           | Biological Process                                               | Cell Component                   |
|-------------|-----------------------------------------------------|------------------------------------------------------------------|----------------------------------|
|             |                                                     | Protein Localization To Plasma Membrane                          | Membrane                         |
|             |                                                     | Positive Regulation Of Myoblast Fusion                           | Perinuclear Region Of Cytoplasm  |
|             |                                                     | Positive Regulation Of Endocytic Recycling                       | Recycling Endosome Membrane      |
|             |                                                     |                                                                  | Extracellular Vesicle Exosome    |
| ELOF1       | Elongation factor 1 homolog (S. cerevisiae)         | Transcription, Dna-Templated                                     | Cell Component                   |
|             |                                                     | Regulation Of Transcription, Dna-Templated                       | Nucleus                          |
|             |                                                     | Translation                                                      |                                  |
|             |                                                     | Biological Process                                               |                                  |
| FCHO1       | FCH domain only 1                                   | Endocytosis                                                      | Plasma Membrane                  |
|             |                                                     | Clathrin Coat Assembly                                           | Coated Pit                       |
|             |                                                     | Clathrin-Mediated Endocytosis                                    | Membrane                         |
| GFRA1       | GDNF family receptor alpha 1                        | Transmembrane Receptor Protein Tyrosine Kinase Signaling Pathway | Extracellular Space              |
|             |                                                     | Nervous System Development                                       | Plasma Membrane                  |
|             |                                                     | Anatomical Structure Morphogenesis                               | External Side Of Plasma Membrane |
|             |                                                     | Cell Migration                                                   | Membrane                         |
|             |                                                     | Neuron Differentiation                                           | Extrinsic Component Of Membrane  |
|             |                                                     | Neuron Projection Development                                    | Axon                             |
|             |                                                     |                                                                  | Anchored Component Of Membrane   |
|             |                                                     |                                                                  | Neuronal Cell Body               |
|             |                                                     |                                                                  | Receptor Complex                 |
|             |                                                     |                                                                  | Extracellular Vesicular Exosome  |
| GPAM        | Glycerol-3-phosphate acyltransferase, mitochondrial | Lipid Metabolic Process                                          | Mitochondrion                    |
|             |                                                     | Fatty Acid Metabolic Process                                     | Mitochondrial Outer Membrane     |
|             |                                                     | Acyl-Coa Metabolic Process                                       | Mitochondrial Inner Membrane     |
|             |                                                     | Triglyceride Metabolic Process                                   | Plasma Membrane                  |
|             |                                                     | Glycerophospholipid Metabolic Process                            | Membrane                         |
|             |                                                     | Metabolic Process                                                | Integral Component Of Membrane   |
|             |                                                     | Phospholipid Biosynthetic Process                                | Mitochondrial Membrane           |
|             |                                                     | Response To Glucose                                              |                                  |
|             |                                                     | Positive Regulation Of Triglyceride Biosynthetic Process         |                                  |
|             |                                                     | Response To Activity                                             |                                  |
|             |                                                     | Triglyceride Biosynthetic Process                                |                                  |
|             |                                                     | Cellular Response To Insulin Stimulus                            |                                  |
|             |                                                     | Positive Regulation Of Multicellular Organism Growth             |                                  |
|             |                                                     | Positive Regulation Of Activated T Cell Proliferation            |                                  |
|             |                                                     | Cellular Lipid Metabolic Process                                 |                                  |
|             |                                                     | Regulation Of Cytokine Secretion                                 |                                  |
|             |                                                     | Defense Response To Virus                                        |                                  |
|             |                                                     | Fatty Acid Homeostasis                                           |                                  |

| Gene Symbol | Gene Name                     | Biological Process                                                                 | Cell Component                 |
|-------------|-------------------------------|------------------------------------------------------------------------------------|--------------------------------|
|             |                               | Phospholipid Homeostasis                                                           |                                |
|             |                               | Negative Regulation Of Activation-Induced Cell Death Of T Cells                    |                                |
|             |                               | Interleukin-2 Secretion                                                            |                                |
| GPR12       | G protein-coupled receptor 12 | Cellular Calcium Ion Homeostasis                                                   | Cell                           |
|             |                               | Signal Transduction                                                                | Plasma Membrane                |
|             |                               | G-Protein Coupled Receptor Signalling Pathway                                      | Membrane                       |
|             |                               |                                                                                    | Integral Component Of Membrane |
| HDAC5       | Histone deacetylase 5         | Negative Regulation Of Transcription From Rna Polymerase Ii Promoter               | Histone Deacetylase Complex    |
|             |                               | Osteoblast Development                                                             | Nucleus                        |
|             |                               | Transcription, Dna-Templated                                                       | Cytoplasm                      |
|             |                               | Regulation Of Transcription, Dna-Templated                                         | Golgi Apparatus                |
|             |                               | Transcription From Rna Polymerase Ii Promoter                                      | Cytosol                        |
|             |                               | Inflammatory Response                                                              | Nuclear Body                   |
|             |                               | Nervous System Development                                                         | Protein Complex                |
|             |                               | Heart Development                                                                  |                                |
|             |                               | Regulation Of Myotube Differentiation                                              |                                |
|             |                               | Negative Regulation Of Myotube Differentiation                                     |                                |
|             |                               | Chromatin Modification                                                             |                                |
|             |                               | Histone Deacetylation                                                              |                                |
|             |                               | B Cell Differentiation                                                             |                                |
|             |                               | Multicellular Organismal Response To Stress                                        |                                |
|             |                               | Regulation Of Gene Expression, Epigenetic                                          |                                |
|             |                               | B Cell Activation                                                                  |                                |
|             |                               | Response To Cocaine                                                                |                                |
|             |                               | Response To Drug                                                                   |                                |
|             |                               | Regulation Of Protein Binding                                                      |                                |
|             |                               | Negative Regulation Of Osteoblast Differentiation                                  |                                |
|             |                               | Negative Regulation Of Striated Muscle Tissue Development                          |                                |
|             |                               | Negative Regulation Of Transcription, Dna-Templated                                |                                |
|             |                               | Positive Regulation Of Transcription From Rna Polymerase Ii Promoter               |                                |
|             |                               | Regulation Of Skeletal Muscle Fiber Development                                    |                                |
|             |                               | Positive Regulation Of Sequence-Specific Dna Binding Transcription Factor Activity |                                |
|             |                               | Regulation Of Striated Muscle Cell Differentiation                                 |                                |
|             |                               | Renal Tubule Morphogenesis                                                         |                                |
|             |                               | Cellular Response To Fluid Shear Stress                                            |                                |
|             |                               | Negative Regulation Of Cell Migration Involved In Sprouting                        |                                |
|             |                               | Angiogenesis                                                                       |                                |
|             |                               | Positive Regulation Of Neural Precursor Cell Proliferation                         |                                |
|             |                               | Positive Regulation Of Stem Cell Proliferation                                     |                                |

| Gene Symbol                                                           | Gene Name                                             | Biological Process                                                                                                                 | Cell Component                  |
|-----------------------------------------------------------------------|-------------------------------------------------------|------------------------------------------------------------------------------------------------------------------------------------|---------------------------------|
| HSPA2                                                                 | Heat Shock 70kDa Protein2                             | Positive Regulation Of Protein Phosphorylation                                                                                     | Synaptonemal Complex            |
|                                                                       |                                                       | Male Meiosis                                                                                                                       | Male Germ Cell Nucleus          |
|                                                                       |                                                       | Male Meiosis I                                                                                                                     | Nucleus                         |
|                                                                       |                                                       | Spermatid Development                                                                                                              | Mitochondrion                   |
|                                                                       |                                                       | Positive Regulation Of Cyclin-Dependent Protein Serine/Threonine Kinase Activity Involved In G2/M Transition Of Mitotic Cell Cycle | Cytosol                         |
|                                                                       |                                                       | Protein Refolding                                                                                                                  | Cell Surface                    |
|                                                                       |                                                       | Synaptonemal Complex Disassembly                                                                                                   | Membrane                        |
|                                                                       |                                                       | Negative Regulation Of Inclusion Body Assembly                                                                                     | Catsper Complex                 |
|                                                                       |                                                       |                                                                                                                                    | Extracellular Vesicular Exosome |
|                                                                       |                                                       |                                                                                                                                    | Blood Microparticle             |
|                                                                       |                                                       | IRS1                                                                                                                               | Insulin receptor substrate 1    |
| Signal Transduction                                                   | Nucleus                                               |                                                                                                                                    |                                 |
| Insulin Receptor Signaling Pathway                                    | Cytoplasm                                             |                                                                                                                                    |                                 |
| Regulation Of Gene Expression                                         | Cytosol                                               |                                                                                                                                    |                                 |
| Positive Regulation Of Glucose Metabolic Process                      | Plasma Membrane                                       |                                                                                                                                    |                                 |
| Phosphatidylinositol 3-Kinase Signaling                               | Insulin Receptor                                      |                                                                                                                                    |                                 |
| Lipid Catabolic Process                                               | Caveola                                               |                                                                                                                                    |                                 |
| Insulin Secretion                                                     | Ciliary Basal Body                                    |                                                                                                                                    |                                 |
| Positive Regulation Of Cell Migration                                 | Intracellular Membrane-Bounded Organelle              |                                                                                                                                    |                                 |
| Mammary Gland Development                                             |                                                       |                                                                                                                                    |                                 |
| Response To Caffeine                                                  |                                                       |                                                                                                                                    |                                 |
| Positive Regulation Of Fatty Acid Beta-Oxidation                      |                                                       |                                                                                                                                    |                                 |
| Response To Insulin                                                   |                                                       |                                                                                                                                    |                                 |
| Cellular Response To Insulin Stimulus                                 |                                                       |                                                                                                                                    |                                 |
| Protein Localization To Nucleus                                       |                                                       |                                                                                                                                    |                                 |
| Positive Regulation Of Phosphorylation                                |                                                       |                                                                                                                                    |                                 |
| Response To Peptide Hormone                                           |                                                       |                                                                                                                                    |                                 |
| Protein Kinase B Signaling                                            |                                                       |                                                                                                                                    |                                 |
| Positive Regulation Of Phosphatidylinositol 3-Kinase Activity         |                                                       |                                                                                                                                    |                                 |
| Positive Regulation Of Glycogen Biosynthetic Process                  |                                                       |                                                                                                                                    |                                 |
| Positive Regulation Of Glucose Import                                 |                                                       |                                                                                                                                    |                                 |
| Negative Regulation Of Insulin Receptor Signaling Pathway             |                                                       |                                                                                                                                    |                                 |
| Positive Regulation Of Insulin Receptor Signaling Pathway             |                                                       |                                                                                                                                    |                                 |
| Negative Regulation Of Insulin Secretion                              |                                                       |                                                                                                                                    |                                 |
| Insulin-Like Growth Factor Receptor Signaling Pathway                 |                                                       |                                                                                                                                    |                                 |
| Protein Heterooligomerization                                         |                                                       |                                                                                                                                    |                                 |
| Positive Regulation Of Glucagon Secretion                             |                                                       |                                                                                                                                    |                                 |
| Negative Regulation Of Somatostatin Secretion                         |                                                       |                                                                                                                                    |                                 |
| Positive Regulation Of Glucose Import In Response To Insulin Stimulus |                                                       |                                                                                                                                    |                                 |
|                                                                       |                                                       |                                                                                                                                    |                                 |
|                                                                       |                                                       |                                                                                                                                    |                                 |
| MARCKS                                                                | Myristoylated alanine-rich protein kinase C substrate | None                                                                                                                               | Cytoplasm                       |

| Gene Symbol | Gene Name                                            | Biological Process                                                   | Cell Component                               |
|-------------|------------------------------------------------------|----------------------------------------------------------------------|----------------------------------------------|
|             |                                                      | Molecular Function:                                                  | Centrosome                                   |
|             |                                                      | Actin Binding                                                        | Cytoskeleton                                 |
|             |                                                      | Protein Kinase C Binding                                             | Cell Cortex                                  |
|             |                                                      | Protein Binding                                                      | Membrane                                     |
|             |                                                      | Calmodulin Binding                                                   | Germinal Vesicle                             |
| MCF2L       | MCF.2 cell line derived transforming sequence-like   | Rho Protein Signal Transduction                                      | Extracellular Space                          |
|             |                                                      | Positive Regulation Of Rho Gtpase Activity                           | Intracellular                                |
|             |                                                      | Intracellular Signal Transduction                                    | Cytoplasm                                    |
|             |                                                      | Positive Regulation Of Transcription From Rna Polymerase Ii Promoter | Plasma Membrane                              |
|             |                                                      |                                                                      | Membrane                                     |
|             |                                                      |                                                                      | Lamellipodium                                |
| MYEF2       | Myosin, light chain 4, alkali; atrial, embryonic     | Regulation Of The Force Of Heart Contraction                         | Myosin Complex                               |
|             |                                                      | Positive Regulation Of Atpase Activity                               | A Band                                       |
|             |                                                      | Cardiac Muscle Contraction                                           |                                              |
| P2RX3       | Purinergic receptor P2X, ligand-gated ion channel, 3 | Response To Hypoxia                                                  | Integral Component Of Nuclear Inner Membrane |
|             |                                                      | Transport                                                            | Rough Endoplasmic Reticulum                  |
|             |                                                      | Ion Transport                                                        | Golgi Apparatus                              |
|             |                                                      | Cation Transport                                                     | Integral Component Of Plasma Membrane        |
|             |                                                      | Synaptic Transmission                                                | Membrane                                     |
|             |                                                      | Neuromuscular Synaptic Transmission                                  | Integral Component Of Membrane               |
|             |                                                      | Response To Temperature Stimulus                                     | Axon                                         |
|             |                                                      | Response To Heat                                                     | Neuron Projection                            |
|             |                                                      | Response To Cold                                                     | Neuronal Cell Body                           |
|             |                                                      | Response To Mechanical Stimulus                                      | Terminal Bouton                              |
|             |                                                      | Response To Carbohydrate                                             | Dendritic Spine                              |
|             |                                                      | Response To Organic Substance                                        | Receptor Complex                             |
|             |                                                      | Urinary Bladder Smooth Muscle Contraction                            | Membrane Raft                                |
|             |                                                      | Neuronal Action Potential                                            |                                              |
|             |                                                      | Peristalsis                                                          |                                              |
|             |                                                      | Response To Atp                                                      |                                              |
|             |                                                      | Purinergic Nucleotide Receptor Signaling Pathway                     |                                              |
|             |                                                      | Regulation Of Synaptic Plasticity                                    |                                              |
|             |                                                      | Behavioral Response To Pain                                          |                                              |
|             |                                                      | Sensory Perception Of Taste                                          |                                              |
|             |                                                      | Protein Homooligomerization                                          |                                              |
|             |                                                      | Cation Transmembrane Transport                                       |                                              |
| PLA2G12A    | Phospholipase A2, group XIIA                         | Lipid Metabolic Process                                              | Extracellular Region                         |



| Gene Symbol | Gene Name                                                                                         | Biological Process                                                   | Cell Component                    |
|-------------|---------------------------------------------------------------------------------------------------|----------------------------------------------------------------------|-----------------------------------|
|             |                                                                                                   | Phospholipid Metabolic Process                                       | Intracellular                     |
|             |                                                                                                   | Lipid Catabolic Process                                              | Cytoplasm                         |
|             |                                                                                                   |                                                                      | Endoplasmic Reticulum             |
|             |                                                                                                   |                                                                      | Golgi Apparatus                   |
| PRELID1     | PRELI domain containing 1                                                                         | Transport                                                            | Nucleus                           |
|             |                                                                                                   | Lipid Transport                                                      | Mitochondrion                     |
|             |                                                                                                   | Apoptotic Process                                                    | Mitochondrion Intermembrane Space |
|             |                                                                                                   | Negative Regulation Of Mitochondrial Membrane Potential              | Protein Complex                   |
|             |                                                                                                   | Positive Regulation Of Endopeptidase Activity                        |                                   |
|             |                                                                                                   | Phospholipid Transport                                               |                                   |
|             |                                                                                                   | Negative Regulation Of Apoptotic Process                             |                                   |
|             |                                                                                                   | Regulation Of T Cell Differentiation                                 |                                   |
| PREP        | Prolyl endopeptidase                                                                              | Proteolysis                                                          | Nucleus                           |
|             |                                                                                                   | Protein Metabolic Process                                            | Cytoplasm                         |
|             |                                                                                                   |                                                                      | Cytosol                           |
|             |                                                                                                   |                                                                      | Membrane                          |
| PTGR1       | Prostaglandin Reductase 1                                                                         | Oxidative-Reduction Process                                          | Cytoplasm                         |
|             |                                                                                                   |                                                                      | Extracellular Vesicular Exosome   |
| RABL5       | RAB, member RAS oncogene family-like 5                                                            | No Ontology: Human Given                                             | Centrosome                        |
|             |                                                                                                   | Small Gtpase Mediated Signal Transduction                            | Cilium                            |
|             |                                                                                                   |                                                                      | Intraciliary Transport Particle B |
| SMARCA4     | SWI/SNF related, matrix associated, actin dependent regulator of chromatin, subfamily a, member 4 | Negative Regulation Of Transcription From Rna Polymerase Ii Promoter | Nuclear Chromatin                 |
|             |                                                                                                   | Cell Morphogenesis                                                   | Heterochromatin                   |
|             |                                                                                                   | Blood Vessel Development                                             | Extracellular Space               |
|             |                                                                                                   | Vasculogenesis                                                       | Nucleus                           |
|             |                                                                                                   | In Utero Embryonic Development                                       | Nuclear Euchromatin               |
|             |                                                                                                   | Blastocyst Growth                                                    | Perichromatin Fibrils             |
|             |                                                                                                   | Blastocyst Hatching                                                  | Nucleolus                         |
|             |                                                                                                   | Liver Development                                                    | Membrane                          |
|             |                                                                                                   | Outflow Tract Morphogenesis                                          | Swi/Snf Complex                   |
|             |                                                                                                   | Atp Catabolic Process                                                | Protein Complex                   |
|             |                                                                                                   | Nucleosome Assembly                                                  | Npbf Complex                      |
|             |                                                                                                   | Nucleosome Disassembly                                               | Nbaf Complex                      |
|             |                                                                                                   | Chromatin Remodeling                                                 |                                   |
|             |                                                                                                   | Methylation-Dependent Chromatin Silencing                            |                                   |
|             |                                                                                                   | Transcription, Dna-Templated                                         |                                   |
|             |                                                                                                   | Regulation Of Transcription, Dna-Templated                           |                                   |

| Gene Symbol | Gene Name         | Biological Process                                                   | Cell Component  |
|-------------|-------------------|----------------------------------------------------------------------|-----------------|
|             |                   | Transcription From Rna Polymerase Ii Promoter                        |                 |
|             |                   | Nervous System Development                                           |                 |
|             |                   | Glial Cell Fate Determination                                        |                 |
|             |                   | Heart Development                                                    |                 |
|             |                   | Positive Regulation Of Cell Proliferation                            |                 |
|             |                   | Dna Methylation On Cytosine Within A Cg Sequence                     |                 |
|             |                   | Chromatin Modification                                               |                 |
|             |                   | Stem Cell Maintenance                                                |                 |
|             |                   | Neurogenesis                                                         |                 |
|             |                   | Extracellular Matrix Organization                                    |                 |
|             |                   | Keratinocyte Differentiation                                         |                 |
|             |                   | Negative Regulation Of Cell Growth                                   |                 |
|             |                   | Regulation Of Cell Migration                                         |                 |
|             |                   | Forebrain Development                                                |                 |
|             |                   | Hindbrain Development                                                |                 |
|             |                   | Embryonic Hindlimb Morphogenesis                                     |                 |
|             |                   | Aortic Smooth Muscle Cell Differentiation                            |                 |
|             |                   | Atp-Dependent Chromatin Remodeling                                   |                 |
|             |                   | Negative Regulation Of Apoptotic Process                             |                 |
|             |                   | Positive Regulation Of Dna Binding                                   |                 |
|             |                   | Positive Regulation By Host Of Viral Transcription                   |                 |
|             |                   | Histone H3 Acetylation                                               |                 |
|             |                   | Positive Regulation Of Cell Differentiation                          |                 |
|             |                   | Negative Regulation Of Transcription, Dna-Templated                  |                 |
|             |                   | Positive Regulation Of Transcription, Dna-Templated                  |                 |
|             |                   | Positive Regulation Of Transcription From Rna Polymerase Ii Promoter |                 |
|             |                   | Embryonic Organ Morphogenesis                                        |                 |
|             |                   | Epidermis Morphogenesis                                              |                 |
|             |                   | Positive Regulation Of Sequence-Specific Dna Binding Transcription   |                 |
|             |                   | Factor Activity                                                      |                 |
|             |                   | Definitive Erythrocyte Differentiation                               |                 |
|             |                   | Heart Trabecula Formation                                            |                 |
|             |                   | Negative Regulation Of Androgen Receptor Signaling Pathway           |                 |
|             |                   | Pharyngeal Arch Artery Morphogenesis                                 |                 |
|             |                   | Lens Fiber Cell Development                                          |                 |
| SPEF2       | Sperm flagellar 2 | Immune System Development                                            | Manchette       |
|             |                   | Spermatogenesis                                                      | Cytoplasm       |
|             |                   | Fertilization                                                        | Golgi Apparatus |
|             |                   | Multicellular Organismal Aging                                       | Sperm Midpiece  |
|             |                   | Axoneme Assembly                                                     |                 |
|             |                   | Embryonic Neurocranium Morphogenesis                                 |                 |
|             |                   | Skeletal System Morphogenesis                                        |                 |
|             |                   | Brain Morphogenesis                                                  |                 |

| Gene Symbol | Gene Name                                                         | Biological Process                                  | Cell Component                  |
|-------------|-------------------------------------------------------------------|-----------------------------------------------------|---------------------------------|
|             |                                                                   | Cilium Morphogenesis                                |                                 |
|             |                                                                   | Respiratory System Development                      |                                 |
| THBD        | Thrombomodulin                                                    | Female Pregnancy                                    | Extracellular Space             |
|             |                                                                   | Blood Coagulation                                   | Plasma Membrane                 |
|             |                                                                   | Homeostasis                                         | Cell Surface                    |
|             |                                                                   | Embryo Development                                  | Membrane                        |
|             |                                                                   | Negative Regulation Of Coagulation                  | Integral Component Of Membrane  |
| TIFA        | TRAF-interacting protein with a forkhead-associated domain        | I-Kappab Kinase/Nf-Kappab Signalling                | Intracellular                   |
| TRIM2       | Tripartite motif-containing 2                                     | Protein Ubiquitination                              | Intracellular                   |
|             |                                                                   | Regulation Of Neuron Apoptotic Process              | Cytoplasm                       |
| UCHL1       | Ubiquitin carboxyl-terminal esterase L1 (ubiquitin thiolesterase) | Response To Ischemia                                | Intracellular                   |
|             |                                                                   | Proteolysis                                         | Cell                            |
|             |                                                                   | Ubiquitin-Dependent Protein Catabolic Process       | Nucleus                         |
|             |                                                                   | Axonogenesis                                        | Cytoplasm                       |
|             |                                                                   | Axon Target Recognition                             | Endoplasmic Reticulum           |
|             |                                                                   | Adult Walking Behaviour                             | Cytosol                         |
|             |                                                                   | Cell Proliferation                                  | Plasma Membrane                 |
|             |                                                                   | Protein Deubiquitination                            | Membrane                        |
|             |                                                                   | Sensory Perception Of Pain                          | Axon                            |
|             |                                                                   | Axon Transport Of Mitochondrion                     | Neuronal Cell Body              |
|             |                                                                   | Eating Behaviour                                    | Extracellular Vesicular Exosome |
|             |                                                                   | Negative Regulation Of Map Kinase Activity          |                                 |
|             |                                                                   | Muscle Fiber Development                            |                                 |
|             |                                                                   | Neuromuscular Process                               |                                 |
| ZFP382      | Zinc finger protein 382                                           | Negative Regulation Of Transcription, Dna-Templated | Nucleus                         |
|             |                                                                   |                                                     | Intracellular                   |
