# Supplementary material
Source: PubMed Central journal article supplement (PMC4582963)
Supplement: imm0146-0217-sd2.pdf [file imm0146-0217-sd2.pdf]

| AmiGO2 GO Ontology Enrichment Analysis                                        |                    |                      |                  |              |          |                      |
|-------------------------------------------------------------------------------|--------------------|----------------------|------------------|--------------|----------|----------------------|
| Term                                                                          | GO Hierarchy Level | Background frequency | Sample frequency | Expected     | +/-      | P-value (Bonferonni) |
| <b>Biological Regulation</b>                                                  | <b>2</b>           |                      |                  |              |          |                      |
| positive regulation of molecular function (GO:0044093)                        | 4                  | 1158                 | 8                | 1.975        | +        | 0.02687              |
| <b>Regulation of Cell Proliferation</b>                                       | <b>5</b>           |                      |                  |              |          |                      |
| regulation of stem cell proliferation (GO:0072091)                            | 6                  | 95                   | 3                | 0.1621       | +        | 0.02458              |
| regulation of activated T cell proliferation (GO:0046006)                     | 10                 | 29                   | 2                | 0.04947      | +        | 0.04851              |
| positive regulation of activated T cell proliferation (GO:0046007)            | 11                 | 21                   | 2                | 0.03582      | +        | 0.02566              |
| <b>Apoptotic Process</b>                                                      | <b>6</b>           |                      |                  |              |          |                      |
| regulation of lymphocyte apoptotic process (GO:007022)                        | 10                 | 56                   | 3                | 0.09553      | +        | 0.005271             |
| positive regulation of leukocyte apoptotic process (GO:007023)                | 11                 | 27                   | 2                | 0.04606      | +        | 0.04214              |
| positive regulation of lymphocyte apoptotic process (GO:007024)               | 12                 | 17                   | 2                | 0.029        | +        | 0.01689              |
| negative regulation of release of cytochrome c from mitochondrion (GO:007025) | 10                 | 17                   | 2                | 0.029        | +        | 0.01689              |
| <b>Cellular component organization or biogenesis (GO:007026)</b>              | <b>2</b>           | <b>3832</b>          | <b>17</b>        | <b>6.537</b> | <b>+</b> | <b>0.003038</b>      |
| membrane organization (GO:0061024)                                            | 4                  | 468                  | 5                | 0.7984       | +        | 0.04842              |
| organelle organization (GO:0006996)                                           | 4                  | 2187                 | 11               | 3.731        | +        | 0.03324              |
| single-organism organelle organization (GO:1902589)                           | 5                  | 1497                 | 9                | 2.554        | +        | 0.03194              |
| mitochondrion morphogenesis (GO:0070584)                                      | 7                  | 19                   | 2                | 0.03241      | +        | 0.02105              |
| cellular component disassembly (GO:0022411)                                   | 4                  | 101                  | 3                | 0.1723       | +        | 0.02933              |

| Term                                               | GO Hierarchy Level | Background frequency | Sample frequency | Expected | +/- | P-value (Bonferonni) |
|----------------------------------------------------|--------------------|----------------------|------------------|----------|-----|----------------------|
| <b>Localization</b>                                | <b>2</b>           |                      |                  |          |     |                      |
| cellular localization (GO:0051641)                 | 3                  | 1542                 | 9                | 2.631    | +   | 0.03947              |
| establishment of localization in cell (GO:0051649) | 4                  | 1217                 | 9                | 2.076    | +   | 0.006963             |
| vesicle localization (GO:0051648)                  | 5                  | 112                  | 3                | 0.1911   | +   | 0.03948              |
| establishment of vesicle localization (GO:0051650) | 6                  | 104                  | 3                | 0.1774   | +   | 0.03191              |
| single-organism transport (GO:0044765)             | 5                  | 2274                 | 11               | 3.879    | +   | 0.04602              |
| <b>Development Process</b>                         | <b>2</b>           |                      |                  |          |     |                      |
| multicellular organismal aging (GO:0010259)        | 5                  | 26                   | 2                | 0.04435  | +   | 0.03912              |
| <b>Signaling</b>                                   | <b>2</b>           |                      |                  |          |     |                      |
| neuromuscular synaptic transmission (GO:0007274)   | 7                  | 19                   | 2                | 0.03241  | +   | 0.02105              |
| <b>Response to Stimulus</b>                        | <b>2</b>           |                      |                  |          |     |                      |
| response to ischemia (GO:0002931)                  | 4                  | 18                   | 2                | 0.03071  | +   | 0.01891              |
| response to organonitrogen compound (GO:0010243)   | 6                  | 417                  | 5                | 0.7114   | +   | 0.02896              |
| response to alkaloid (GO:0043279)                  | 7                  | 74                   | 3                | 0.1262   | +   | 0.01191              |
