# Supplementary material
Source: PubMed Central journal article supplement (PMC4582963)
Supplement: imm0146-0217-sd3.pdf [file imm0146-0217-sd3.pdf]

| GeneMANIA GO Enrichment Analysis           |  |          |
|--------------------------------------------|--|----------|
| Function                                   |  | FDR      |
| Execution Phase of Apoptosis               |  | 1.11E-01 |
| Apoptotic Mitochondrial Changes            |  | 2.72E-01 |
| Release of Cytochrome C from Mitochondria  |  | 4.00E-01 |
| Protein Kinase C Binding                   |  | 4.00E-01 |
| Regulation of Lymphocyte Apoptotic Process |  | 4.00E-01 |
| Mitochondrion Organization                 |  | 4.00E-01 |
| Response to Ischemia                       |  | 6.75E-01 |
| Leukocyte Apoptotic Process                |  | 6.75E-01 |
| Neuromuscular Synaptic Transmission        |  | 6.75E-01 |
| Lymphocyte Apoptotic Process               |  | 6.75E-01 |
