# Supplementary material
Source: PubMed Central journal article supplement (PMC4582963)
Supplement: imm0146-0217-sd4.pdf [file imm0146-0217-sd4.pdf]

| Gene Lists    |          |              |              |                     |                |                                                           |
|---------------|----------|--------------|--------------|---------------------|----------------|-----------------------------------------------------------|
| No Duplicates | AmiGO    | GeneMANIA    | Vesiclepedia | Present in Vesicles | Species        | Reference                                                 |
| 5930416I19RIK | AP1AR    | AP1AR        | AP1AR        | Y                   | h.s.           | PMID: 19930720                                            |
| AP1AR         | BAP1     | BAP1         | BAP1         | Y                   | h.s.           | PMID: 19930720, 19011622                                  |
| BAP1          | BCL2L1   | BCL2L1       | BCL2L1       | Y                   | h.s.           | PMID: 19930720, 17536014                                  |
| BCL2L1        | BTBD10   | BTBD10       | BTBD10       | Y                   | h.s.           | PMID: 19930720                                            |
| BTBD10        | CAPSL    | CAPSL        | CAPSL        | N                   |                |                                                           |
| CAPSL         | CD24     | <b>CASP7</b> | <b>CASP7</b> | Y                   | h.s.           | PMID: 19930720                                            |
| CD24 CD24A    | COQ7     | CD24A        | CD24A        | Y                   | m.m./h.s./r.n. | PMID: 17700640, 21601258, 19188015, 17700640, 20124479    |
| COQ7          | CSRP2    | COQ7         | COQ7         | Y                   | h.s.           | PMID: 19930720                                            |
| CSRP2         | DCK      | CSRP2        | CSRP2        | Y                   | h.s.           | PMID: 19930720                                            |
| DCK           | DDC      | DCK          | DCK          | Y                   | h.s.           | PMID: 19930720                                            |
| DDC           | DNAJC21  | DDC          | DDC          | Y                   | h.s.           | PMID: 19056867                                            |
| DNAJC21       | EGFL6    | DNAJC21      | DNAJC21      | Y                   | h.s.           | PMID: 19930720                                            |
| EGFL6         | EHD2     | EGFL6        | EGFL6        | N                   |                |                                                           |
| EHD2          | ELOF1    | EHD2         | EHD2         | Y                   | h.s.           | PMID: 20224111, 19011622, 21630462, 22148876, 1956867     |
| ELOF1         | FCHO1    | ELOF1        | ELOF1        | Y                   | h.s.           | PMID: 19930720, 19011622                                  |
| FCHO1         | GFRA1    | FCHO1        | FCHO1        | Y                   | h.s.           | PMID: 19930720                                            |
| GFRA1         | GPAM     | GFRA1        | GFRA1        | Y                   | h.s.           | PMID: 19056867                                            |
| GPAM          | GPR12    | GPAM         | GPAM         | Y                   | h.s.           | PMID: 19930720                                            |
| GPR12         | HDAC5    | GPR12        | GPR12        | Y                   | h.s.           | PMID: 19011622                                            |
| HDAC5         | HSPA2    | HDAC5        | HDAC5        | Y                   | h.s.           | PMID: 19011622, unpublished                               |
|               | IRS1     |              |              |                     |                | Unpublished, PMID 17956143, 19837982, 19930720, 22285593, |
| HSPA2 ZBTB1   |          | HSPA2        | HSPA2        | Y                   | m.m./h.s./r.n. | 19011622, 21630462, 22030351, 19056867, 21828046          |
| IRS1          | MARCKS   | IRS1         | IRS1         | Y                   | h.s./r.n.      | PMID: 19930720, 19367702                                  |
|               | MCF2L    |              |              |                     |                | PMID: 20458337, 20224111, 17956143, 19930720, 19011622,   |
| MARCKS        |          | MARCKS       | MARCKS       | Y                   | h.s.           | 21630462, 22148876, 22030351, 19056867                    |
| MCF2L         | MYEF2    | MCF2L        | MCF2L        | Y                   | h.s.           | PMID: 19011622                                            |
| MYEF2         | MYL4     | MYEF2        | MYEF2        | N                   |                |                                                           |
| MYL4          | P2RX3    | MYL4         | MYL4         | N                   |                |                                                           |
| P2RX3         | PLA2G12A | P2RX3        | P2RX3        | Y                   | h.s.           | PMID: 19011622                                            |
| PLA2G12A      | PRELID1  | PLA2G12A     | PLA2G12A     | Y                   | h.s./r.n.      | PMID: 19930720, 20124479                                  |

|                                                                            |                 |                 |                 |                 |           |                                                         |
|----------------------------------------------------------------------------|-----------------|-----------------|-----------------|-----------------|-----------|---------------------------------------------------------|
| PRELID1                                                                    | PREP            | PRELID1         | PRELID1         | Y               | m.m./h.s. | PMID: 17486113, 19930720, 19011622                      |
| PREP                                                                       | PTGR1           | PREP            | PREP            | Y               | h.s./r.n. | PMID: 19930720, 19011622, 22148876, 21828046            |
|                                                                            | RABL5           |                 |                 |                 |           | PMID: 19930720, 22285593, 19011622, 22148876, 15326289, |
| PTGR1                                                                      |                 | PTGR1           | PTGR1           | Y               | h.s.      | 19056867                                                |
| RABL5                                                                      | SMARCA4         | RABL5           | RABL5           | Y               | h.s.      | PMID: 19930720                                          |
| SMARCA4                                                                    | SPEF2           | SMARCA4         | SMARCA4         | Y               | h.s.      | PMID: 19930720, 19011622                                |
| SPEF2                                                                      | THBD            | SPEF2           | SPEF2           | N               |           |                                                         |
| THBD                                                                       | TIFA            | THBD            | THBD            | Y               | h.s.      | PMID: 10393703                                          |
| TIFA                                                                       | TRIM2           | TIFA            | TIFA            | Y               | h.s.      | PMID: 19930720                                          |
| TRIM2                                                                      | UCHL1           | TRIM2           | TRIM2           | Y               | m.m./h.s. | PMID: 17486113, 19930720, 19011622                      |
| UCHL1                                                                      | ZNF382          | UCHL1           | UCHL1           | Y               | h.s.      | PMID: 19930720, 19011622, 22148876                      |
| ZNF382                                                                     |                 |                 |                 |                 |           |                                                         |
|                                                                            | <b>38 Genes</b> | <b>38 Genes</b> | <b>38 Genes</b> | <b>33 Genes</b> |           |                                                         |
| <b>39 Genes</b>                                                            |                 |                 |                 |                 |           | h.s = Homo sapiens                                      |
|                                                                            |                 |                 |                 |                 |           | m.m. = Mus musculus                                     |
|                                                                            |                 |                 |                 |                 |           | r.n. = Rattus norvegicus                                |
| NOTE: Caspase 7 added due to known CD24 interaction. Highlighted in green. |                 |                 |                 |                 |           |                                                         |
| Note: GeneMANIA and Amigo analysis performed on list "No Duplicates".      |                 |                 |                 |                 |           |                                                         |
| 5930416I19RIK was not annotated and could not be used in either analysis   |                 |                 |                 |                 |           |                                                         |
| ZNF382 was recognized and annotated by Amigo, but not GeneMANIA            |                 |                 |                 |                 |           |                                                         |
